# Supplementary material for: Determining the role of SGLT2 inhibition with Empagliflozin in the development of diabetic retinopathy
Source: PubMed Central journal article supplement (PMC8891593; doi:10.1042/bsr20212209), 2022-03-02
Supplement: BSR-2021-2209_supp.pdf [file BSR-2021-2209_supp.pdf]

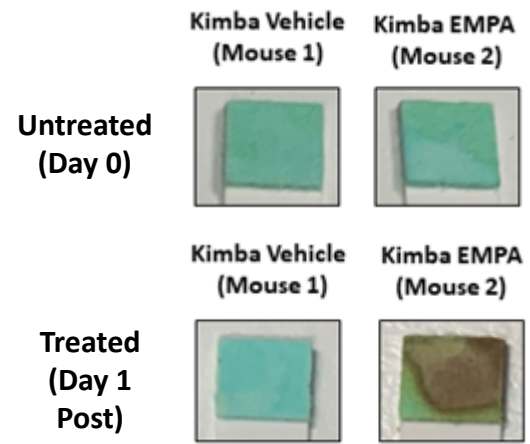

**Supplementary Figure 1**

*Supplementary Figure 1*

SGLT2 inhibition with EMPA promotes glucosuria in the non-diabetic Kimba mice. Urine glucose levels 1 day post treatment: blue (0 mM), brown ( $\geq$  111mM).

| Gene symbol | Gene name                                             | Function [27]                                                       | Fold change | P value     |
|-------------|-------------------------------------------------------|---------------------------------------------------------------------|-------------|-------------|
| Cyp2a5      | cytochrome P450, family 2, subfamily a 5              | arachidonic acid epoxygenase activity                               | 3.857240565 | 0.051503669 |
| Kera        | keratocan                                             | cornea development in camera-type eye                               | 3.742389644 | 0.019479387 |
| Sln         | sarcolipin                                            | enzyme regulator activity                                           | 3.725250729 | 0.053350941 |
| Cldn4       | claudin 4                                             | chloride channel activity, chloride transport                       | 3.724254171 | 0.021719967 |
| Siglecg     | sialic acid binding Ig-like lectin G                  | adaptive immune response                                            | 3.666614651 | 0.01536648  |
| Snora74a    | small nucleolar RNA, H/ACA box 74A                    | biological process                                                  | 3.66610682  | 0.016285591 |
| Dnase2b     | deoxyribonuclease II beta                             | deoxyribonuclease II activity                                       | 3.638864293 | 0.022619922 |
| Tnfsf18     | tumor necrosis factor (ligand) superfamily, member 18 | immune response                                                     | 3.631109631 | 0.026011525 |
| Cldnd2      | claudin domain containing 2                           | biological process                                                  | 3.274848206 | 0.040599007 |
| Csf3        | colony stimulating factor 3 (granulocyte)             | cytokine activity                                                   | 3.266595584 | 0.044957601 |
| Ccr2        | chemokine (C-C motif) receptor 2                      | angiogenesis, cellular homeostasis                                  | 2.95884095  | 0.040011022 |
| Rbp2        | retinol binding protein 2, cellular                   | fatty acid binding and transport, lipid binding, retinal binding    | 2.343465742 | 0.045135505 |
| Crygn       | crystallin, gamma N                                   | lens development in camera-type eye                                 | 1.090323443 | 0.033317793 |
| Capn13      | Calpain 13                                            | calcium-dependent cysteine-type endopeptidase activity, proteolysis | 3.349445394 | 0.040831222 |
| Vmn2r2      | vomer nasal 2, receptor 2                             | G protein-coupled receptor activity                                 | 3.321895849 | 0.042172927 |
| Acsm1       | acyl-CoA synthetase medium-chain family member 1      | acyl-CoA metabolic process, ATP binding                             | 3.31576368  | 0.040418542 |
| Gucy2d      | guanylate cyclase 2d                                  | ATP binding, cGMP biosynthetic process                              | 3.296558921 | 0.05027578  |
| Cfhr2       | complement factor H-related 2                         | regulation of complement activation                                 | 3.295712475 | 0.050133267 |
| Mef2b       | myocyte enhancer factor 2B                            | cell differentiation, transcription regulator complex               | 2.728570385 | 0.017852111 |
| Cd200r3     | CD200 receptor 3                                      | regulation of neuroinflammatory response, protein binding           | 3.294094673 | 0.043557658 |
| Slc26a9     | solute carrier family 26, member 9                    | positive regulation of gene expression, ATPase binding              | 3.274467007 | 0.040783998 |
| Tm4sf4      | transmembrane 4 superfamily member 4                  | biological process                                                  | 3.266058588 | 0.044985742 |
| Cxcl11      | chemokine (C-X-C motif) ligand 11                     | chemokine activity                                                  | 2.698354012 | 0.026731546 |

### Supplementary Table 1: Genes which are upregulated in Diabetic Akimba mice treated with EMPA.

List of up-regulated genes identified in gene expression analysis between EMPA and Vehicle treated Akimba mice. n=3 mice/group.

| Gene symbol | Gene name                                      | Function [27]                                                                          | Fold change  | P value     |
|-------------|------------------------------------------------|----------------------------------------------------------------------------------------|--------------|-------------|
| Il12rb1     | interleukin 12 receptor, beta 1                | cytokine binding, IL12R binding, positive regulation of activated T cell proliferation | -1.801369438 | 0.049798122 |
| Gpr132      | G protein-coupled receptor 132                 | signal transduction, negative regulation of G2/M transition of mitotic cell cycle      | -2.478512667 | 0.045420965 |
| Nkg7        | natural killer cell group 7 sequence           | biological process                                                                     | -2.562122832 | 0.042873324 |
| Hbq1a       | hemoglobin, theta 1A                           | haptoglobin binding, oxygen binding                                                    | -3.553915532 | 0.04022278  |
| Cd200r1     | CD200 receptor 1                               | negative regulation of interleukin-6 production, macrophage and T cell migration       | -3.881890464 | 0.043080023 |
| Pck1        | phosphoenolpyruvate carboxykinase 1, cytosolic | cellular response to insulin stimulus, gluconeogenesis                                 | -3.920497257 | 0.029120686 |
| Tfpi2       | tissue factor pathway inhibitor 2              | hemostasis                                                                             | -4.764314802 | 0.001556838 |
| Capn8       | calpain 8                                      | calcium-dependent cysteine-type endopeptidase activity                                 | -3.151810943 | 0.052999586 |
| Kap         | kidney androgen regulated protein              | extracellular region                                                                   | -2.7618039   | 0.053316686 |

### Supplementary Table 2: Genes which are downregulated in Diabetic Akimba mice treated with EMPA.

List of down-regulated genes identified in gene expression analysis between EMPA and Vehicle treated Akimba mice. n=3 mice/group.
